RESEARCH ARTICLE

# Host niche may determine disease-driven extinction risk

Mark Blooi<sup>1</sup>✉, Alexandra E. Laking<sup>1,2</sup>✉, An Martel<sup>1</sup>, Freddy Haesebrouck<sup>1</sup>, Merlijn Jocque<sup>2,3</sup>, Tom Brown<sup>2</sup>, Stephen Green<sup>2,4</sup>, Miguel Vences<sup>5</sup>, Molly C. Bletz<sup>5</sup>, Frank Pasmans<sup>\*1</sup>

**1** Department of Pathology, Bacteriology and Avian Diseases, Faculty of Veterinary Medicine, Ghent University, Mellebeke, Belgium, **2** Operation Wallacea, Hope House, Old Bolingbroke, Lincolnshire, United Kingdom, **3** Hopkins Marine Station, Stanford University, Pacific Grove, California, United States of America, **4** Centre for Applied Zoology, Cornwall College Newquay, Cornwall, United Kingdom, **5** Zoological Institute, Technische Universität Braunschweig, Braunschweig, Germany

✉ These authors contributed equally to this work.

\* [Frank.Pasmans@UGent.be](mailto:Frank.Pasmans@UGent.be)

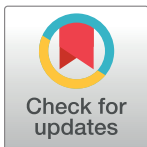

## Abstract

The fungal pathogen *Batrachochytrium dendrobatidis* (*Bd*) drives declines and extinctions in amphibian communities. However, not all regions and species are equally affected. Here, we show that association with amphibian aquatic habitat types (bromeliad phytotelmata versus stream) across Central America results in the odds of being threatened by *Bd* being five times higher in stream microhabitats. This differential threat of *Bd* was supported in our study by a significantly lower prevalence of *Bd* in bromeliad-associated amphibian species compared to riparian species in Honduran cloud forests. Evidence that the bromeliad environment is less favorable for *Bd* transmission is exemplified by significantly less suitable physicochemical conditions and higher abundance of *Bd*-ingesting micro-eukaryotes present in bromeliad water. These factors may inhibit aquatic *Bd* zoospore survival and the development of an environmental reservoir of the pathogen. Bromeliad phytotelmata thus may act as environmental refuges from *Bd*, which contribute to protecting associated amphibian communities against chytridiomycosis-driven amphibian declines that threaten the nearby riparian communities.

## OPEN ACCESS

**Citation:** Blooi M, Laking AE, Martel A, Haesebrouck F, Jocque M, Brown T, et al. (2017) Host niche may determine disease-driven extinction risk. PLoS ONE 12(7): e0181051. <https://doi.org/10.1371/journal.pone.0181051>

**Editor:** Louise A. Rollins-Smith, Vanderbilt University School of Medicine, UNITED STATES

**Received:** October 12, 2016

**Accepted:** June 26, 2017

**Published:** July 13, 2017

**Copyright:** © 2017 Blooi et al. This is an open access article distributed under the terms of the [Creative Commons Attribution License](https://creativecommons.org/licenses/by/4.0/), which permits unrestricted use, distribution, and reproduction in any medium, provided the original author and source are credited.

**Data Availability Statement:** All relevant data are within the paper and its Supporting Information files.

**Funding:** The authors received no specific funding for this work.

**Competing interests:** The authors have declared that no competing interests exist.

## Introduction

Chytridiomycosis, caused by the chytridiomycete fungus, *Batrachochytrium dendrobatidis* (*Bd*) [1], drives global amphibian declines and extinctions [2–5] and is currently considered the greatest infectious disease threat to biodiversity [6,7]. Although *Bd* has a worldwide distribution with confirmed presence in over 500 amphibian species from 52 countries [6,8], its most devastating impact is centered on specific regions, such as mountainous regions in Central America [3,9]. In these areas, the cumulative time individuals of a species spend in riparian habitats significantly increases the likelihood of decline [5,9–12]. Therefore, even in these hot-spots of chytridiomycosis-driven declines, a proportion of species are less affected [9,13,14],

especially those with arboreal, bromeliad-associated habits [15–18]. The reasons for these differential infection and disease dynamics of *Bd* have been suggested to be multifactorial and dependent on local environmental-, host- and pathogen-associated factors [13,19–24]. Since metamorph mortality disproportionately contributes to chytridiomycosis-driven declines [25], the habitat of juvenile stages and all associated mechanisms affecting *Bd* presence, survival and transmission in these habitats is expected to play a major role in *Bd*-related amphibian declines. Mitchell et al. (2008) [26] predict that the longer the fungus persists in the aquatic environment, the greater its impact on host populations. Besides abiotic factors such as temperature and pH [22,24,27], the abundance and diversity of aquatic, *Bd*-ingesting microorganisms (predatory micro-eukaryotes) have recently been shown to dictate the *Bd* infection and disease dynamics in a European hotspot of chytridiomycosis by driving aquatic pathogen loads [28].

Here we test the hypothesis that the bromeliad environment provides a “safe haven” for amphibians from chytridiomycosis in comparison with the riparian habitats in Central American cloud forests by 1) comparing to what extent Neotropical bromeliad- versus stream-associated amphibians are threatened in their survival due to *Bd*. Additionally, we 2) assessed *Bd* infection levels of bromeliad- versus stream-associated amphibians in Cusuco National Park, Honduras and 3) evaluated which environmental parameters in streams and tank bromeliads help explain observed differences in *Bd* infection on these amphibians.

## Methods

### Correlation between conservation status of Central American anuran species and their association with bromeliads or streams

To compare the threat of chytridiomycosis in Central American bromeliad- and stream-associated anurans, a list was compiled based on amphibian species known to occur in this region [29–31] and based on known habitat usage. Only species known to inhabit or reproduce in bromeliad or stream environments were included (S1 Table). Species with reports of occasional or rare sightings in one of the two microhabitats were excluded. A distinction was made between association to a microhabitat and restricted habitat for larval development, for further comparison. Species that reproduce in streams as well as other waterbodies were included in the larval development category. The IUCN Red List of Threatened Species was utilized to determine the IUCN conservation category of each species, as well as the species major threats (S1 Table). IUCN categories were grouped: data deficient (DD), least concern and near threatened (LC & NT), threatened and vulnerable (EN & VU), and critically endangered or extinct (CR & EX). Threats were grouped into five categories: no threats, habitat loss, pet trade, pollution and *Bd*. Any mention of one of these threats for an anuran species whether it be future, suspected or proven, resulted in inclusion of the species into each corresponding category.

### Study site

This study was conducted in Cusuco National Park (CNP), Honduras. This park is approximately 234km<sup>2</sup> in area, with elevation ranging from 500 m to 2425 m above sea level. CNP is located in north-western Honduras and is part of the Merendón mountain range. It is included in the Meso-American biodiversity hotspot and is characterized by high species richness [32] and ranked within the top 25 protected areas globally, of highest importance for conserving irreplaceable amphibian diversity [33]. CNP was chosen as the study site because of its large number of endemic amphibian species [34], of which several are IUCN red listed and negatively affected by *Bd* [18,25,32]. Widespread presence of *Bd* has been confirmed here in

multiple species, but *Bd*-induced declines have been observed only for riparian amphibian species [18,25]. Sample collection took place between June and August in 2014 and 2015. Permission for the collection and export of all mentioned samples was obtained by Operation Wallacea (Hope House, Old Bolingbroke, Lincolnshire, UK) and the OpWall Honduran counterpart Expediciones y Servicios Ambientales de Cusuco (ESAC) and issued by the Secretaría de Estado en el Desocho de Agricultura y Granadería (Number: 21839).

## Sample collection

To determine the prevalence of *Bd* in different aquatic environments and in amphibians, filtered water and amphibian skin or mouthpart swabs, depending on life stage, were collected from bromeliads and streams and their associated anurans around CNP's base camp. To determine the ability of *Bd* to persist in different aquatic habitats, water samples from the same habitats were collected. The locations were chosen based on accessibility, presence of the desired microhabitat and comparable elevation levels.

**Bromeliad and stream microhabitats.** Thirty-two bromeliads and twelve sampling locations derived from the main stream running through CNP were selected for sampling. Large bromeliads (circumference >45 cm) were sampled in order to allow sufficient water volumes (30 ml) to be withdrawn and due to the preference of bromeliad-associated amphibians for larger specimens [16]. For each bromeliad and stream site, GPS coordinates, canopy openness (improved Moosehorn design [35]), water pH (pH test kit, JBL GmbH & co, Neuhofen Germany), water temperature and ambient air temperature were recorded. If animals were not present, water parameters were still taken, and if bromeliads spilled water the amphibians within were sampled, leading to a dataset with missing data for some of the respective parameters. While full data sets for all sampling sites were not available, the spatial distribution of our sampling is extensive enough to exclude random site effects. *Bd* prevalence in the bromeliads ( $n = 24$ ) and streams ( $n = 5$ ) was determined by filtering (0.45  $\mu\text{m}$  syringe filters) 30 ml or 1 liter of water respectively, with subsequent storage of the filters in 70% ethanol until further processing (see below for sample processing). These filters were also used for micro-eukaryote diversity assessment using 18S amplicon-based next generation sequence analysis. Microscopic determination and abundance estimates of aquatic micro-eukaryotes were carried out on 1 ml of the collected water samples.

**Amphibian samples.** Prevalence of *Bd* in encountered amphibians was determined from non-invasively collected skin swabs in post-metamorphic individuals. For tadpoles, mouthparts were swabbed. For the swabbing technique established protocols were used [36,37]. Swabs were stored in 70% ethanol in order to preserve the samples in humid field conditions [25].

## Sample processing

**Prevalence of *Batrachochytrium dendrobatidis*.** DNA was extracted from swabs using 100  $\mu\text{l}$  of Prepman Ultra DNA extraction buffer [36,38]. Ethanol was removed from the swabs prior to DNA extraction by centrifugation, disposal of the supernatant and leaving the samples open until evaporation of all ethanol had occurred in a laminar flow hood. DNA extraction from the water filters was carried out using the MoBio Powersoil<sup>®</sup> DNA isolation kit (MoBio Laboratories, Carlsbad, USA) following the protocol of Walker et al. [39] with minor modifications as follows: As disposable syringe filters were used, filter housings were opened and the ethanol on the filters was allowed to evaporate prior to DNA extraction and the manufacturer's protocol was followed for homogenization of samples (vortexing the samples instead of using a Mini-Beadbeater). All extracted DNA samples (derived from swabs and filters) were diluted

1/10 in HPLC water for reducing PCR inhibition [36] and stored at  $-20^{\circ}\text{C}$  until further processing. Samples were processed using the *Bd*-specific real-time PCR described by Boyle et al. (2004) on a CFX96 real-time system (Bio-Rad Laboratories, Hercules, CA). To check whether PCR inhibition did occur, all DNA samples were assayed in a *Bd* PCR inhibition assay in which an internal positive control (IPC) was added to a single well for each sample [36]. If inhibition was detected in a sample, BSA was added to the real-time PCR mixture, and if this did not alleviate inhibition, samples were further diluted ten-fold until no inhibition could be detected [40]. Real-time PCR results (genomic equivalents (GE) of *Bd* zoospores as determined by comparing real-time PCR values to values obtained by assaying a standard dilution series of reference *Bd* DNA (JEL 423) were corrected for the applied dilution factor and converted to loads per swab or per filter.

**Persistence of *Bd* in aquatic microhabitats.** We compared the capacity of the 15 bromeliad and 15 stream water samples to reduce the number of viable *Bd* zoospores using previously described techniques [28,41]. Briefly, suspensions of viable and dead *Bd* zoospores (strain JEL423,  $10^4$  zoospores/ml) were prepared. Death of heat-treated ( $85^{\circ}\text{C}$ , 15 minutes) zoospores was confirmed by checking for growth over 10 days. *Bd* zoospore viability was assessed using the *Bd* ethidium monoazide (EMA) real-time PCR [42]. The conditions assessed were microhabitat (bromeliad, stream), filtration to selectively remove micro-eukaryotes over  $5\ \mu\text{m}$  in size (unfiltered, filtered ( $5\ \mu\text{m}$  syringe filter, GE Healthcare Europe, Belgium)) and time point (0 hours, 24 hours). Controls composed of viable and dead *Bd* zoospores in distilled water were included. In short,  $100\ \mu\text{l}$  of *Bd* zoospore suspension was added to 1 ml of the sample conditions (microhabitat, filtration) in 48-well plates and incubated at  $20^{\circ}\text{C}$ . After 24 hours of incubation,  $7.5\ \mu\text{l}$  of EMA was added to  $150\ \mu\text{l}$  aliquots of all samples and controls and  $142.5\ \mu\text{l}$  of TGH broth (final EMA concentration  $25\ \mu\text{g/ml}$ ), and samples were incubated in the dark and subsequently photo activated (5 minutes, 500 Watt halogen light). EMA exposed samples were transferred to 1.5 ml tubes and washed twice in HPLC water by centrifugation (5000 rpm, 5 minutes,  $20^{\circ}\text{C}$ ). After washing, DNA extraction of the pellet was carried out by resuspending it in  $100\ \mu\text{l}$  Prepman ultra and incubating at  $100^{\circ}\text{C}$  for 10 minutes. All samples were diluted 1/10 and stored at  $-20^{\circ}\text{C}$  until further processing. All conditions were tested in duplicate, and processing of the samples occurred within 72 hours after collection. DNA extracts were processed using the *Bd*-specific real-time PCR [38] as specified in the previous section (including checking for the occurrence of PCR inhibition). Resulting values were used as an indication of *Bd* persistence, as only DNA from viable *Bd* cells is amplified with the EMA real-time PCR [41].

**Micro-eukaryote diversity and abundance estimates using microscopy.** To assess the abundance and community structure of micro-eukaryotes, 1 ml of water from each sampled microhabitat was visually examined drop by drop using a field microscope (Bresser microset). In the case of high numbers or fast movement of micro-eukaryotes one drop of Protoslo<sup>®</sup> Quieting Solution (Carolina Biological Supply Company, Burlington, USA) was applied to the microscopy slide in order to improve taxonomic determination and abundance estimation. Determination of species was carried out using standard determination keys [43,44] and performed as close to species level as possible.

**Micro-eukaryote diversity estimate using 18S rRNA amplicon-based sequencing.** DNA extraction from the water filters was carried out as described earlier. A portion of the V9 region of the eukaryotic 18S rRNA gene was sequenced by adapting a dual-index approach [45]. Illumina adaptors and unique barcodes were included on both the forward (Euk\_1391f) and reverse (Euk\_B) primers [46,47]. PCR conditions and the amplification protocol followed the Earth Microbiome Project 18S protocol (<http://www.earthmicrobiome.org/emp-standard-protocols/18S/>, version 4\_13). In short, PCR reactions contained  $13\ \mu\text{l}$  of DNA-free water,  $10\ \mu\text{l}$  5 Prime MasterMix,  $0.5\ \mu\text{l}$  of each primer ( $10\ \mu\text{M}$ ),  $4\ \mu\text{l}$  of a blocking primer, and  $1.0\ \mu\text{l}$  of

DNA. The blocking primer originally designed for mammals (see Earth Microbiome website) is effective for vertebrates in general and was used to minimize amplification of vertebrate genomic DNA. PCR conditions consisted of a denaturation step of 94°C for 3 minutes, followed by 35 cycles at 94°C for 45 seconds, 65°C for 15 seconds, 57°C for 30 seconds and 72°C for 90 seconds, and a final extension at 72°C for 10 minutes. All samples were then pooled together in approximately equal concentration (as determined by gel band strength), and purified with the Qiagen MiniElute Gel Extraction Kit. The DNA concentration was determined on a Qubit fluorometer using a broadrange dsDNA kit. Paired-end 2x250 v2 chemistry was used to sequence the samples on an Illumina MiSeq (Helmholtz Center for Infection Research, Braunschweig Germany).

All sequence processing was conducted using Quantitative Insights Into Microbial Ecology (MacQIIME v1.9.1, [48]). Forward and reverse reads from each sample were joined and quality filtered to remove low-quality sequences with the QIIME default quality parameters. Remaining good-quality sequences (471,056 sequences) were clustered into operational taxonomic units (OTUs) at 97% similarity using the UCLUST algorithm under an open reference OTU-picking strategy [http://qiime.org/tutorials/open\\_reference\\_illumina\\_processing.html](http://qiime.org/tutorials/open_reference_illumina_processing.html) [49,50] The SILVA 119 release was used as the reference database for reference-based OTU clustering, aligning sequences and assigning taxonomy. The most abundant sequence from each OTU was selected as a representative sequence and these representative sequences were aligned using PyNAST [51]. Taxonomy was assigned using BLAST within QIIME. Samples were rarefied to 1000 reads per sample, allowing the majority of samples to be included in analyses. The OTU table was subsequently filtered in two ways: (1) to include only OTUs of small metazoans, including small arthropods and rotifers, and (2) to include only OTUs of protists.

**Ingestion of *Bd* zoospores.** We assessed to what extent the different organisms present in the water samples were capable of consuming *Bd* zoospores. A *Bd* zoospore suspension was prepared as described previously. CellTracker™ Green CMFDA (Life Technologies, Carlsbad, USA) was added to 1 ml of zoospore suspension (final concentration of the CellTracker 6μM). This mixture was then shielded from light from this step forward and incubated for 30 minutes at 20°C. The mixture was washed in 1 ml of distilled water by centrifugation (3000 rpm, 5 minutes) and incubated for 30 minutes at 20°C. In order to remove excess fluorescent marker, two additional washing steps composed of centrifugation (3000 rpm, 5 minutes) and resuspension in distilled water were performed. Affirmation of viability and fluorescent labelling of zoospores was done using an epifluorescence microscope. Ostracods (*Cypridopsis* spp.), copepods (*Cyclops* spp.), brown planaria (*Dugesia dorotocephala*), nematodes (*Caenorhabditis elegans*) and tardigrades (*Milnesium tardigradum*) were obtained from Carolina Biological Supply Company (Burlington, USA) and maintained as recommended by the supplier. These organisms were chosen due to their similarity to organisms found within the bromeliad and stream microhabitats. One ml of labelled zoospores was added to 1 ml of each of the 5 species of micro-eukaryotes and incubated for 2 hours at 20°C (final concentrations of 100 zoospores per 1 micro-eukaryote). A control prepared by adding fluorescent marker to distilled water (including all incubation and washing steps) was included to check for labelling of cells other than *Bd* zoospores. This control was in turn added to all five species of micro-eukaryotes and incubated for 2 hours at 20°C. Another control was included by adding unlabeled zoospores to the 5 micro-eukaryote species. All combinations were assessed in triplicate. Using an epifluorescence microscope, sample slides were visually screened for ingestion of labelled *Bd* zoospores, without quantification. Fluorescence imaging does not allow the ingested zoospores to be quantified due to the large numbers of (aggregated) zoospores inside the micro-eukaryotes. However, when ingestion took place, it was common throughout the organisms in the sample.

## Statistical analysis

Odds Ratios (ORs), and corresponding 95% confidence intervals, were calculated for the threat of *Bd*, as well as for the number of species in the “endangered” category, compared between bromeliad- and stream-associated species (S1 Table). To test for differences in *Bd* infection intensity, microeukaryote abundance and microeukaryote diversity between microhabitats, pairwise Mann Whitney Wilcoxon tests were performed. To compare prevalence of *Bd* between microhabitats a Fisher’s exact test was performed. For the amplicon-based 18S sequencing data, Chao1 diversity, Shannon diversity and Observed OTU richness were calculated for all samples in each of the OTU tables. Kruskal-Wallis tests were used to compare alpha diversity values between streams and bromeliads. To test for differences in environmental pH, *Bd* persistence, temperature and canopy openness scores between bromeliad and stream microhabitats, Mann—Whitney—Wilcoxon tests were used (all statistical analysis were performed in R, version 3.2.3) [52].

## Results

### Central American bromeliad-associated anuran species are predicted to be less threatened by *Bd* in comparison to their stream-associated counterparts

A comparison of all (184) Central American anurans showed higher numbers of species being threatened by *Bd* in streams compared to anuran species in bromeliads (60% and 27%, respectively) (Fig 1, S1 Table) based on IUCN data for major threats. A higher percentage of stream-associated anuran species is indexed in the critically endangered conservational category when compared to bromeliad-associated species (36% and 6%, respectively) (S1 Table). The odds of being threatened by *Bd* was nearly four times higher (OR: 3.71, 95% CI: 1.5985–8.5985) in stream-associated anurans than in bromeliad-associated anurans. The odds of being in the critically endangered (CR + EX) IUCN conservational category is nearly 9 times higher (OR: 8.88, 95% CI: 2.05–38.54) in stream-associated anurans compared to bromeliad-associated anurans.

### Bromeliad microhabitats are less conducive for *Bd* infection in comparison to stream microhabitats

From the total number of 24 stream sites and 41 bromeliad sites, we found and sampled a total of 116 amphibian individuals from 20 bromeliad sites, and 150 individuals from 18 stream sites. Prevalence of *Bd* in the sampled amphibians, ignoring site and species differences due to sparse data, was significantly lower in bromeliads (3.4%) in comparison to streams (12.4%) (Table 1, Fisher’s exact test,  $p = 0.008$ ), while infection intensity did not differ significantly between the two microhabitats (Fig 2,  $W = 32$ ,  $p = 0.23$ ). While PCR inhibition did occur in the swab samples (11 *Bromeliohyla bromeliacia*, 9 *Ptychohyla hypomykter*, 3 *Cryptotriton nasalis* and 2 *Plectrohyla dasypus*), this could be alleviated in most samples by adding bovine serum albumin (BSA) to 1/10 diluted samples in the real-time PCR mixture. Samples that still showed inhibition after adding BSA (3 *B. bromeliacia*, 3 *C. nasalis*, 2 *P. hypomykter*, 1 *P. dasypus*) were further diluted in HPLC water to 1/100 dilutions, which removed PCR inhibition in all but one sample (*P. dasypus*) in which PCR inhibition was only alleviated after diluting the sample to 1/1000. No additional positive samples were obtained after alleviating PCR inhibition. None of the water samples tested positive for *Bd*. PCR inhibition occurred in 10 of the filtered-water samples (8 derived from bromeliads and 2 from streams), but adding BSA to the real-time PCR mixture alleviated this in all but one sample (bromeliad), which needed to be diluted to 1/

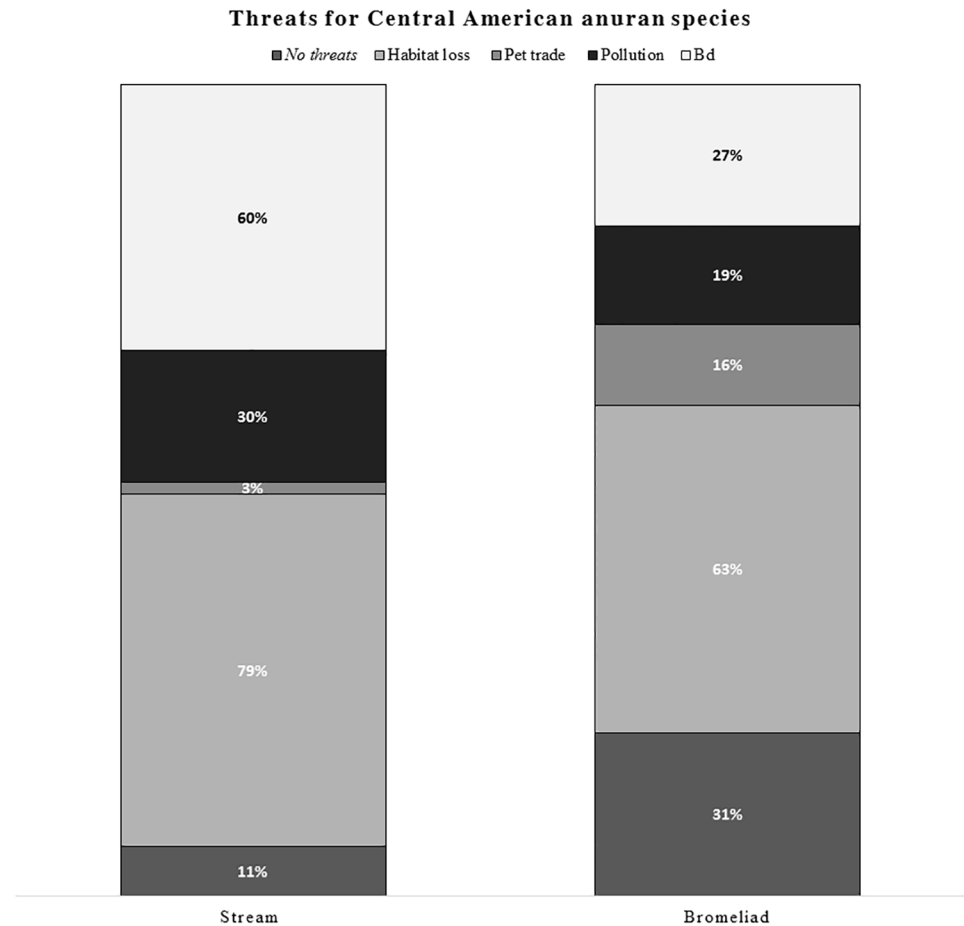

**Fig 1. Threats for Central American bromeliad- and stream-associated anuran species.** Bars indicate the total percentage of each of the five defined threats present for Central American anuran species within bromeliad and stream habitats. The chart is compiled from IUCN red list data (Also see S1 Table) (different threats are from bottom to top: no threats, habitat loss, pet trade, pollution and *Bd*). In this figure, *Plectrohyla dasypus* is included among stream-dwelling species because its larvae develop in streams. However, adults of this species are often associated with bromeliads.

<https://doi.org/10.1371/journal.pone.0181051.g001>

1000 to remove PCR inhibition. Again, no additional positive samples were obtained after alleviating PCR inhibition.

Persistence of *Bd* zoospores in water samples from a subset of 15 stream and 15 bromeliad sites after 24 hours was determined by EMA real-time PCR (Fig 3). PCR inhibition did not occur in the EMA samples. Overall, in the stream microhabitat samples, 1.29 log(10) GE (SD of ±0.93 GE) of viable *Bd* zoospores were recovered on average, while 1.97 log(10) GE (SD of ±0.56) of viable *Bd* zoospores were collected on average when the water was first filtered. For the bromeliad water samples, 0.30 log(10) GE (SD of ±0.52 GE) and 1.80 log(10) GE (SD of ±0.96 GE) of *Bd* zoospores were recovered for the unfiltered and filtered conditions respectively. Statistical analyses revealed significant differences between unfiltered and filtered conditions for bromeliads (Mann Whitney Wilcoxon tests,  $W = 199$ , Bonferroni adjusted  $p < 0.05$ ) as well as a significant difference between unfiltered conditions of the stream and bromeliad microhabitats ( $W = 178$ , Bonferroni adjusted  $p < 0.05$ ). No significant difference was found between unfiltered and filtered conditions for stream ( $W = 163$ , Bonferroni adjusted  $p = 0.15$ ) or between filtered conditions of the two microhabitats ( $W = 112$ , Bonferroni adjusted  $p = 1$ ).

**Table 1. Prevalence of *B. dendrobatidis* in the sampled amphibians.** Prevalence data of *B. dendrobatidis* in the sampled amphibians divided in amphibian taxa, life stages and species.

|                       | Bromeliad                        |             |                    |                                     |                | Stream                        |             |                    |                                     |                |
|-----------------------|----------------------------------|-------------|--------------------|-------------------------------------|----------------|-------------------------------|-------------|--------------------|-------------------------------------|----------------|
|                       |                                  | No. sampled | <i>Bd</i> positive | Mean infection intensity (Min -Max) | Prevalence (%) |                               | No. sampled | <i>Bd</i> positive | Mean infection intensity (Min -Max) | Prevalence (%) |
| <b>Amphibian taxa</b> | Anura                            | 106         | 4                  | 372 (14–1014)                       | 3.7            | Anura                         | 150         | 19                 | 101 (28–252)                        | 12.7           |
|                       | Caudata                          | 10          | 0                  | 0                                   | 0              | Caudata                       | 0           | 0                  | 0                                   | 0              |
|                       | Total                            | 116         | 4                  | 372 (14–1014)                       | 3.4            | Total                         | 150         | 19                 | 101 (28–252)                        | 12.7           |
| <b>Life stages</b>    | Larvae                           | 94          | 4                  | 372 (14–1014)                       | 4.3            | Larvae                        | 135         | 14                 | 117 (48.2–252)                      | 10.4           |
|                       | Metamorphs                       | 2           | 0                  | 0                                   | 0              | Metamorphs                    | 11          | 5                  | 71 (28.1–105.2)                     | 45.4           |
|                       | Juveniles                        | 4           | 0                  | 0                                   | 0              | Juveniles                     | 3           | 0                  | 0                                   | 0              |
|                       | Adults                           | 16          | 0                  | 0                                   | 0              | Adults                        | 1           | 0                  | 0                                   | 0              |
| <b>Species</b>        | <i>Bromeliohyala bromeliacia</i> | 106         | 4                  | 372 (14–1014)                       | 3.8            | <i>Plectrohyla exquisita</i>  | 3           | 2                  | 233 (218–248)                       | 66.7           |
|                       | <i>Cryptotriton nasalis</i>      | 10          | 0                  | 0                                   | 0              | <i>Plectrohyla dasypus</i>    | 45          | 7                  | 107.2 (49.8–252)                    | 15.6           |
|                       |                                  |             |                    |                                     |                | <i>Ptychohyala hypomykter</i> | 82          | 9                  | 72.4 (28.1–204)                     | 11             |
|                       |                                  |             |                    |                                     |                | <i>Duellmanohyla soralia</i>  | 21          | 1                  | 49.8                                | 4.8            |

<https://doi.org/10.1371/journal.pone.0181051.t001>

### Potential abiotic and biotic parameters steering differential survival of *Bd* in bromeliad and stream microhabitats

We surveyed a total of 32 bromeliad sites and 24 stream sites for physicochemical water parameters, and for all of these except one bromeliad site, also data on the micro-eukaryote community diversity were available from microscopic examination. The stream sites were identical to those surveyed for amphibians and *Bd* prevalence (no amphibians found at six of the sites); of the 32 bromeliad sites surveyed, 21 hosted no amphibians (but *Bd* data from amphibians collected in nine additional bromeliad sites were included; see above).

Temperatures were significantly higher and pH significantly more acidic in bromeliads when compared to stream microhabitats (Mann Whitney Wilcoxon,  $W = 687.5, p < 0.001$ ,  $W = 741, p < 0.001$ , respectively). All values were within the growth tolerance limits of *Bd*, however, bromeliads had a greater variation in pH and temperature than streams. Canopy openness scores were not significantly different between bromeliad and stream microhabitats ( $W = 352, p = 0.59$ ). Micro-eukaryote abundance and diversity were significantly higher in bromeliad microhabitats in comparison to stream microhabitats with average abundances of 44.2 and 10.6 organisms ( $SD \pm 40.1$  and  $\pm 12.6$ ) and average diversities of 4.1 and 2.0 taxa per ml ( $SD \pm 1.4$  and  $\pm 1.3$ ) respectively (Fig 4A and 4B; abundance:  $W = 647, p < 0.001$ , diversity:  $W = 650, p < 0.001$ ).

Micro-eukaryote community diversity estimates using amplicon-based sequencing revealed that protist diversity was higher in stream water samples (1 liter) compared to the bromeliad water samples (30 ml) (all metrics, Kruskal-Wallis test,  $p < 0.001$ , S1 Fig). Arthropod-rotifer diversity, however, tended to be greater in the bromeliad water samples, even given the small volume examined (Chao1 & OTU Richness,  $p < 0.01$ ; Shannon Diversity,  $p = 0.92$ , S1 Fig).



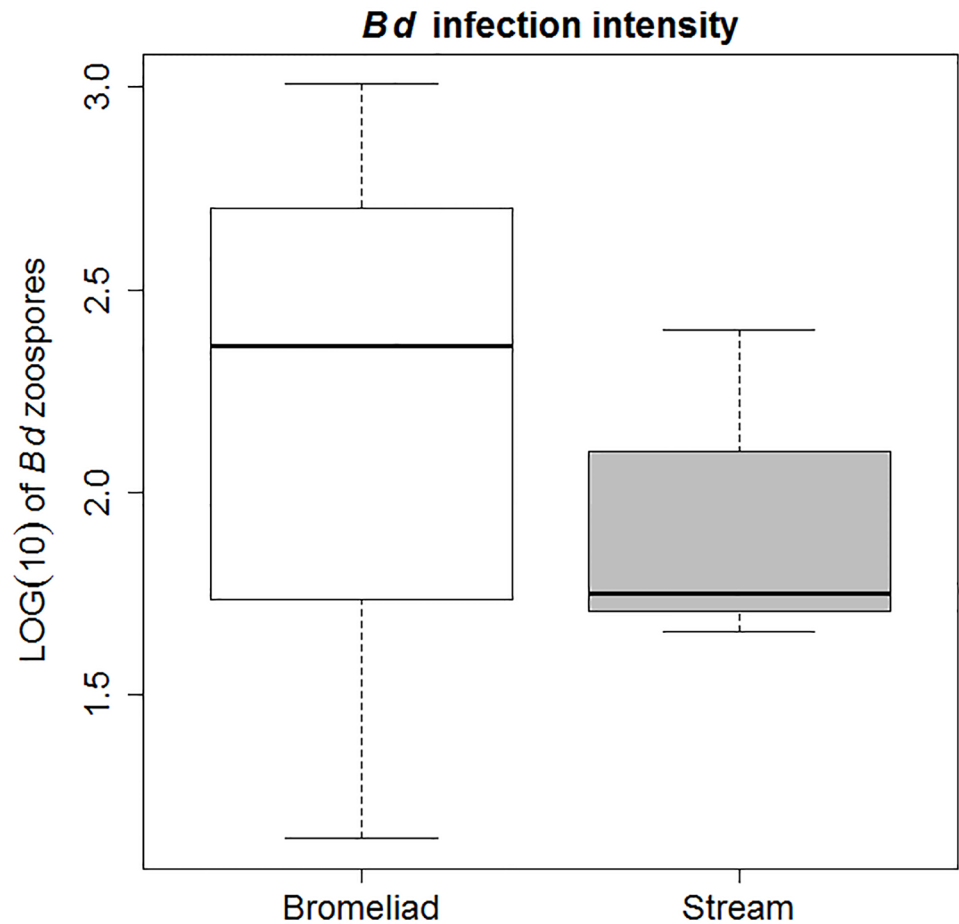

**Fig 2. Boxplot showing infection intensity of *B. dendrobatidis* in the sampled amphibians.** Median (bars), interquartile range (boxes) and total range (whiskers) are shown (Bromeliad  $n = 116$ , Stream  $n = 150$ ).

<https://doi.org/10.1371/journal.pone.0181051.g002>

### Micro-eukaryotes present in bromeliad microhabitats limit survival of *Bd* zoospores

To test if the identified micro-eukaryotes are capable of consuming *Bd* zoospores, fluorescently-labelled zoospores were exposed to ostracods, copepods, brown planarias, nematodes and tardigrades. The micro-eukaryote species chosen for this experiment had a high similarity in size and general habits to those encountered in the water samples. Of the tested micro-eukaryotes, ostracods, copepods and tardigrades showed ingestion of fluorescently-labelled *Bd* zoospores (Fig 5).

### Discussion

Within Central America, *Bd* has had devastating effects on amphibian biodiversity [3,9]. However, within this region, records show that stream-associated anuran species are considerably more likely to be categorized as critically endangered compared to those associated with tank bromeliads (S1 Table; OR of 8.88), and also significantly more threatened by *Bd* (S1 Table; OR of 4.79). Although the IUCN dataset used for these calculations also include non-peer reviewed literature and expert opinions, it does indicate a clear difference in the conservation status and susceptibility to *Bd* of bromeliad- and stream-associated amphibians in Central America. This

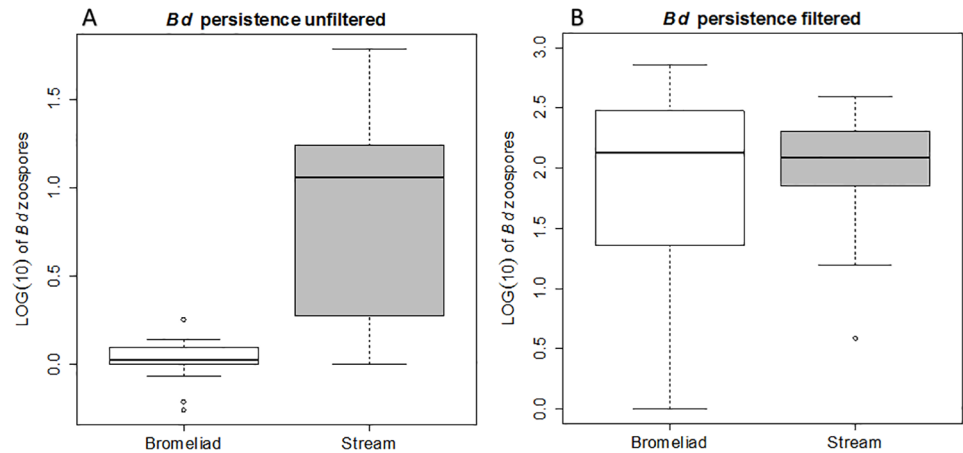

**Fig 3. Persistence of *B. dendrobatidis* in tank bromeliads versus stream water.** For both aquatic microhabitats (bromeliad and stream) the boxplots represent (A) persistence of *B. dendrobatidis* in unfiltered water expressed as logarithmic value of genomic equivalents of viable *B. dendrobatidis* zoospores, (B) persistence of *B. dendrobatidis* in filtered water expressed as logarithmic value of genomic equivalents of viable *B. dendrobatidis* zoospores.

<https://doi.org/10.1371/journal.pone.0181051.g003>

agrees with previous studies suggesting that Central American amphibian species associated with bromeliads may be less affected in *Bd* outbreaks than riparian species in the same region [15–18]. Within Cusuco National Park (CNP), this same trend is observed: there are three declining riparian amphibian species in which chytridiomycosis is a suspected driver, while no negative population trends are reported for the bromeliad-associated species [18,25]. Here, we also show significantly lower prevalence of *Bd* in bromeliad species (3.4%) in comparison to stream-associated species (12.4%). Since only two bromeliad-associated amphibian species exist in CNP at the sampled elevation, and account for prevalence of *Bd* in this microhabitat for this study, differential intrinsic susceptibility of CNP’s amphibian species for *Bd* could be proposed as the underlying cause for the observed differences in *Bd* prevalence. However, taking into account all bromeliad- and stream-associated amphibian species of Central America,

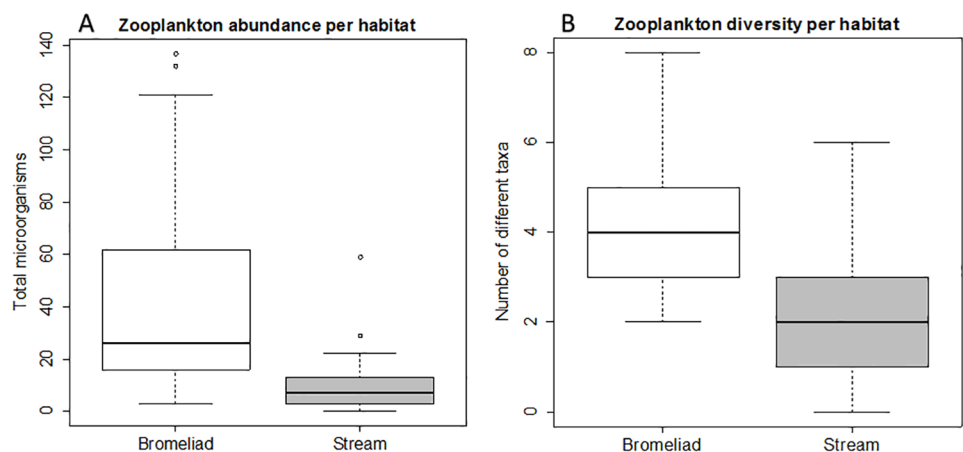

**Fig 4. Boxplots showing micro-eukaryote diversity and abundance estimates using microscopy.** For both aquatic microhabitats (bromeliad and stream) the boxplots represent (A) micro-eukaryote abundance expressed as micro-eukaryote count per ml (Bromeliad n = 31, Stream n = 24), (B) micro-eukaryote diversity expressed as number of different taxa per ml (Bromeliad n = 31, Stream n = 24).

<https://doi.org/10.1371/journal.pone.0181051.g004>

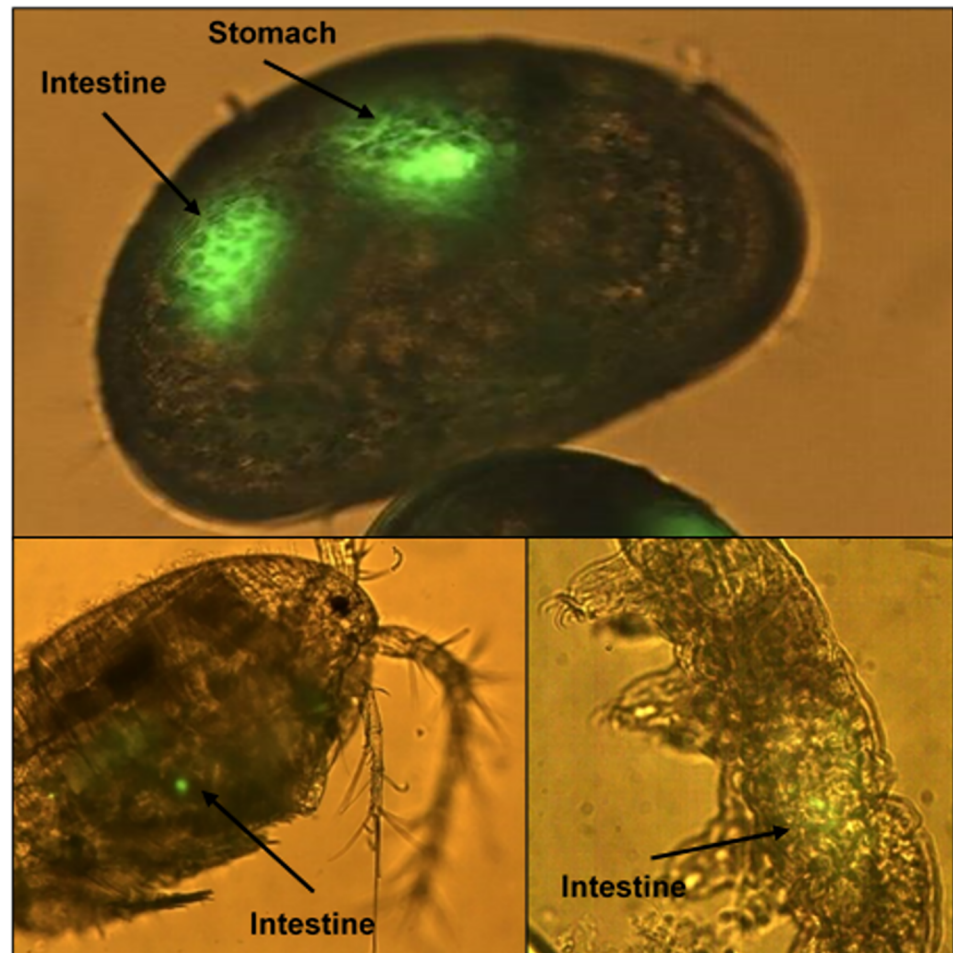

**Fig 5. Micro-eukaryotes showing ingestion of fluorescently labelled zoospores of *B. dendrobatidis*.** Fluorescence microscopy images with arrows indicating presence of fluorescently labelled *B. dendrobatidis* zoospores in different sections of the digestive tract. Top: *Cypridopsis* spp., left: *Cyclops* spp., right: *Milnesium tardigradum*. Scale bar represents 100  $\mu$ m for the upper and left image, and 50  $\mu$ m for the right image.

<https://doi.org/10.1371/journal.pone.0181051.g005>

the same trend in differential effects of *Bd* on these species is observed, indicating other shared disease-steering factors associated with the aquatic habitat types.

Although several hypotheses on the origins of these differential effects of *Bd* have been proposed, it is likely brought forth by a multitude of infection and disease influencing factors. It has to be noted that our data did not support a significant difference in infection intensity between bromeliad- and stream-associated amphibian species. This could indicate that the differences in disease dynamics of *Bd* between bromeliad- and stream-associated amphibian species are restricted to prevalence only. However, during this study, mostly larval and metamorphic individuals were sampled (Table 1), and divergent infection intensities of *Bd* might be found in adult specimens. Outside of its amphibian host, *Bd* relies on aquatic environments for survival and dispersal [53,5]. While the life stages of *Bd* present in the amphibian skin are rather robust, the motile zoospores released in the environment lack a cell wall and are relatively fragile [54,55]. Therefore, it is plausible to assume that environmental influences are able to exert a significant pressure on the dynamics of chytridiomycosis by affecting environmental *Bd* zoospore loads. Distinct differences in abiotic and biotic variables in stream and bromeliad

aquatic microhabitats, could potentially help explain why bromeliad-associated anuran species are able to endure in areas with chytridiomycosis-driven declines, where syntopic riparian species cannot. The tanks present in bromeliads only hold small volumes of water, making these aquatic microhabitats more prone to undergo rapid and frequent fluctuations in physicochemical composition in comparison to relatively stable stream microhabitats [56–58].

In this study, the recorded physicochemical parameters were significantly different between bromeliads and streams, with bromeliads being warmer (18.0°C and 16.3°C, respectively) and more acid environments (4.9 and 6.1, respectively) on average. While no conditions outside of *Bd*'s tolerance limits were recorded, poor growth of *Bd* is described at all recorded pH values of the bromeliad microhabitats, while all pH values recorded for the stream microhabitats fell in the range considered optimal for growth of *Bd* (pH: 6–8) [53], making the bromeliad microhabitats comparatively less suitable for *Bd* survival. Furthermore, even more extreme pH values are known to occur in bromeliad phytotelmata in CNP [58]. The ecological relevance of the pH range considered optimal for *Bd*, as determined under laboratory settings, remains uncertain however [27]. This also applies for temperature. Although the warmer water temperature in bromeliads would suggest that they make more suitable environments for *Bd* proliferation in comparison to stream microhabitats based on *Bd*'s experimentally determined optimal growth temperature range (17–25°C), in nature an increased impact of *Bd* is associated with comparatively lower environmental temperatures [53, 59, 60]. Also, temperature fluctuation, which is expected to occur more frequently and to a greater extent in the small waterbodies in bromeliads, has been determined as a relevant driver of *Bd*'s infection and disease dynamics [24]. Although the overall effects of temperature fluctuation on both host and pathogen are complex and hard to predict [61,62], environments that show broader temperature regimes, and more specifically those that show higher maximum temperatures, are predicted to be less conducive for *Bd* survival [63].

Another environmental parameter shown to affect the infection and disease dynamics of *Bd*, is the abundance of organisms that prey upon/ingest *Bd* zoospores [28,64,65]. In the two distinct sources of water utilized by amphibians in CNP, predatory micro-eukaryotes were more common and diverse in bromeliads (Fig 4A and 4B, S1 Fig). Despite the relatively small sample volume for bromeliads (30 ml in comparison to 1 liter for stream samples) higher diversities of micro-arthropods and rotifers were found in comparison to stream samples with 18S rRNA diversity estimates. Protist diversity estimates were significantly higher in stream samples. While certain protists are known to be able to effectively reduce environmental *Bd* zoospore loads (for example *Paramecium Aurelia* [28]), a large portion of the protist taxa likely have no effect on *Bd* zoospores due to their feeding strategy or autotrophic life style. Furthermore, relatively high diversity estimates with the 18S method in comparison to the microscopic method, might occur due to detection of DNA of organisms not visually present at the time of microscopic examination. The diversity estimates correlate with significant differences in the prevalence of *Bd* in amphibians encountered in the two microhabitats (Table 1) and with differential persistence of *Bd*, with bromeliads acting as a significantly more hostile environment (Fig 3). When predatory micro-eukaryotes were removed from the water by filtration, survival of *Bd* in tank bromeliad water and stream water were equal (Fig 3). Ingestion of *Bd* zoospores by commercially available micro-eukaryotes that resembled species found in the studied microhabitats further strengthens our hypothesis that a multitude of organisms belonging to a vast diversity of taxa are able to reduce environmental loads of *Bd*.

In this study, we have used univariate comparisons of response variables (*Bd* prevalence and infection intensity) and possible predictor variables (temperature, pH, micro-eukaryote communities) among bromeliad and stream sites. While multivariate regression-based models would a priori be a more powerful approach to test for causal relationships among these

variables, such analyses are prevented by the structure of the data in our study, i.e., by the absence of amphibians in many bromeliad sites, the presence of single amphibian individuals in others, and the lack of biotic and abiotic data for additional bromeliad sites from which amphibians were sampled. Furthermore, because different species of amphibians were sampled from bromeliad and stream sites, effects due to common ancestry or host effects on *Bd* infection prevalence cannot be fully excluded either. Differences in risk between bromeliad and stream amphibians could be biased due to more closely related species sharing increased susceptibility to *Bd* [66]. Although the relations between *Bd* infection, habitat type, and biotic and abiotic habitat parameters thus require further testing in this system, our experimental results suggest that the aquatic microhabitats present in bromeliads in CNP are less conducive for *Bd* survival. We therefore hypothesize that the combined biotic and abiotic differences among habitat types are likely steering local *Bd* infection and disease dynamics in CNP. By providing environments in which the build-up of a high infection pressure is inhibited, the steep increase in *Bd* prevalence and infection intensity as witnessed in classical chytridiomycosis outbreak scenarios [2,9,10] may be prevented, and as such, specialized microhabitats like bromeliad phytotelmata could therefore contribute in creating chytridiomycosis-safe refuges in which amphibian species (especially specific microhabitat specialists) can endure during surrounding chytridiomycosis epidemics. This theory thus adds to existing hypotheses such as, differences in species susceptibility to *Bd* and variable disease dynamics due to differences in host densities, to help explain *Bd* infection and disease dynamics [20,67, 68].

Combined with the study of Schmeller et al. [28], the fact that micro-eukaryotes contribute to creating an aquatic environment not conducive to *Bd* zoospore survival in two dramatically different scenarios of chytridiomycosis-driven declines (Pyrenees vs Central American cloud forest), suggests that this may be a common determinant of *Bd* infection dynamics. This knowledge may be applied in chytridiomycosis mitigation efforts by augmentation of natural aquatic habitats to reduce the effect and/or severity of chytridiomycosis where applicable. Although environmental augmentation of existing aquatic habitats is undesirable for the majority of areas most severely impacted by chytridiomycosis, and likely difficult and/or impractical for certain types of water bodies used by amphibians, creating or supplying *Bd* safe zones in problem areas may be worth exploring. This study illustrates the importance of increasing our understanding of the complex interactions at play in the infection and disease dynamics of *Bd* in natural amphibian communities and habitats, and could potentially prove to be valuable for the development of chytridiomycosis mitigation strategies by managing aquatic habitats.

## Supporting information

**S1 Fig. Boxplots showing 18S rRNA microeukaryote diversity and richness estimates for bromeliad and stream microhabitats for rarefied datasets (1000 reads per sample).** Plots show total number of operational taxonomic units (OTUs), Shannon diversity, and Chao1 diversity per sample. Number of OTUs represents an uncorrected representation of the number of different microeukaryotes per sample (i.e., species richness), whereas the Chao1 index estimates richness, i.e., the total number of species present in a community, by correcting species richness based on the number of singletons (an OTU represented by a single read in a sample), assuming that such singletons indicate the species inventory is incomplete. The Shannon index is a community diversity index combining species richness and abundance into a single value of evenness.

(DOCX)

**S1 Table. Bromeliad- and stream-associated Central American anuran species included in the assessments of IUCN conservation status and of occurring threats, with their corresponding IUCN categories, larval development or adult association to the habitat and threats.**

(XLSX)

**S2 Table. Data collected from the bromeliad and stream sampling locations.** Data includes physicochemical parameters, *Bd* prevalence and infection intensity and micro-eukaryote abundance and diversity.

(XLSX)

## Acknowledgments

We are grateful to all staff and volunteers of Operation Wallacea for their assistance in the field and for all logistical support they provided during this project, and to the people of Buenos Aires village for their guidance through the Honduran rainforest.

## Author Contributions

**Conceptualization:** Mark Blooi, Alexandra E. Laking, An Martel, Frank Pasmans.

**Formal analysis:** Mark Blooi, Alexandra E. Laking, An Martel, Miguel Vences, Molly C. Bletz, Frank Pasmans.

**Investigation:** Mark Blooi, Alexandra E. Laking.

**Methodology:** Mark Blooi, Alexandra E. Laking, An Martel, Miguel Vences, Molly C. Bletz, Frank Pasmans.

**Project administration:** Mark Blooi, Alexandra E. Laking, An Martel, Merlijn Jocque, Stephen Green, Frank Pasmans.

**Resources:** An Martel, Freddy Haesebrouck, Frank Pasmans.

**Supervision:** An Martel, Frank Pasmans.

**Validation:** Mark Blooi.

**Visualization:** Mark Blooi, Alexandra E. Laking, An Martel, Freddy Haesebrouck, Merlijn Jocque, Tom Brown, Stephen Green, Miguel Vences, Molly C. Bletz, Frank Pasmans.

**Writing – original draft:** Mark Blooi, Alexandra E. Laking.

**Writing – review & editing:** Mark Blooi, Alexandra E. Laking, An Martel, Freddy Haesebrouck, Merlijn Jocque, Tom Brown, Stephen Green, Miguel Vences, Molly C. Bletz, Frank Pasmans.

## References

1. Longcore JE, Pessier AP, Nichols DK. *Batrachochytrium dendrobatidis* gen et sp nov, a chytrid pathogenic to amphibians. *Mycologia*. 1999; 91(2):219–227.
2. Vredenburg VT, Knapp RA, Tunstall TS, Briggs CJ. Dynamics of an emerging disease drive large-scale amphibian population extinctions. *Proc Natl Acad Sci USA*. 2010; 107(21):9689–9694. <https://doi.org/10.1073/pnas.0914111107> PMID: 20457913
3. Skerratt LF, Berger L, Speare R, Cashins S, McDonald KR, Phillott AD, et al. Spread of chytridiomycosis has caused the rapid global decline and extinction of frogs. *Ecohealth*. 2007; 4(2):125–134.

4. Bosch J, Martinez-Solano I, Garcia-Paris M. Evidence of a chytrid fungus infection involved in the decline of the common midwife toad (*Alytes obstetricans*) in protected areas of central Spain. *Biol Conserv*. 2001; 97(3):331–337.
5. Berger L, Speare R, Daszak P, Green DE, Cunningham AA, Goggin CL, et al. Chytridiomycosis causes amphibian mortality associated with population declines in the rain forests of Australia and Central America. *Proc Natl Acad Sci USA*. 1998; 95(15):9031–9036.
6. Kilpatrick AM, Briggs CJ, Daszak P. The ecology and impact of chytridiomycosis: an emerging disease of amphibians. *Trends Ecol Evol*. 2010; 25(2):109–118 <https://doi.org/10.1016/j.tree.2009.07.011> PMID: 19836101
7. Fisher MC, Henk DA, Briggs CJ, Brownstein JS, Madoff LC, McCraw SL, et al. Emerging fungal threats to animal, plant and ecosystem health. *Nature*. 2012; 484(7393):186–194. <https://doi.org/10.1038/nature10947> PMID: 22498624
8. Olson DH, Aanensen DM, Ronnenberg KL, Powell CI, Walker SF, Bielby J, et al. Mapping the global emergence of *Batrachochytrium dendrobatidis*, the amphibian chytrid fungus. *PLoS One*. 2013; 8(2).
9. Lips KR, Brem F, Brenes R, Reeve JD, Alford RA, Voyles J, et al. Emerging infectious disease and the loss of biodiversity in a Neotropical amphibian community. *Proc Natl Acad Sci USA*. 2006; 103(9):3165–3170. <https://doi.org/10.1073/pnas.0506889103> PMID: 16481617
10. Cheng TL, Rovito SM, Wake DB, Vredenburg VT. Coincident mass extirpation of neotropical amphibians with the emergence of the infectious fungal pathogen *Batrachochytrium dendrobatidis*. *Proc Natl Acad Sci USA*. 2011; 108(23):9502–9507. <https://doi.org/10.1073/pnas.1105538108> PMID: 21543713
11. Ron SR, Duellman WE, Coloma LA, Bustamante MR. Population decline of the Jambato toad *Atelopus ignescens* (Anura: Bufonidae) in the Andes of Ecuador. *J Herpetol*. 2003; 37(1):116–126.
12. Lips KR, Reeve JD, Witters LR. Ecological traits predicting amphibian population declines in Central America. *Conserv Biol*. 2003; 17(4):1078–1088.
13. Bradley PW, Gervasi SS, Hua J, Cothran RD, Relyea RA, Olson DH, et al. Differences in sensitivity to the fungal pathogen *Batrachochytrium dendrobatidis* among amphibian populations. *Conserv Biol*. 2015; 29(5):1347–1356. <https://doi.org/10.1111/cobi.12566> PMID: 26219571
14. Crawford AJ, Lips KR, Bermingham E. Epidemic disease decimates amphibian abundance, species diversity, and evolutionary history in the highlands of central Panama. *Proc Natl Acad Sci USA*. 2010; 107(31):13777–13782. <https://doi.org/10.1073/pnas.0914115107> PMID: 20643927
15. Lindquist ED, Shin MJ, Cossel JO, Stuckert AMM, Bletz MC, Trimmer NC. Chytrid in a canopy amphibian: Picado's bromeliad treefrog, *Isthmohyla picadoi* (Hylidae), persists at a site affected by *Batrachochytrium dendrobatidis*. *Herpetol Rev*. 2011; 42(2):205–208.
16. Stuckert AMM, Stone JP, Asper JR, Rinker MG, Rut CL, Trimmer NC, et al. Microhabitat use and spatial distribution in Picado's Bromeliad Treefrog, *Isthmohyla picadoi* (Anura, Hylidae). *Phyllomedusa*. 2009; 8:125–134.
17. Lannoo MJ. *Amphibian Declines: The conservation status of United States species* 1st edition. University of California Press; 2005.
18. Kolby JE. Climbing for chytrid: An aerial pursuit for answers in Honduras. *FrogLog*. 2011; 96:26–27.
19. Spitzen-van der Sluijs A, Martel A, Hallmann CA, Bosman W, Garner TW, van Rooij P, et al. Environmental determinants of recent endemism of *Batrachochytrium dendrobatidis* infections in amphibian assemblages in the absence of disease outbreaks. *Conserv Biol*. 2014; 28(5):1302–1311. <https://doi.org/10.1111/cobi.12281> PMID: 24641583
20. Searle CL. Differential host susceptibility to *Batrachochytrium dendrobatidis*, an emerging amphibian pathogen. *Conserv Biol*. 2011; 25(5):965–974. <https://doi.org/10.1111/j.1523-1739.2011.01708.x> PMID: 21732979
21. Searle CL, Biga LM, Spatafora JW, Blaustein AR. A dilution effect in the emerging amphibian pathogen *Batrachochytrium dendrobatidis*. *Proc Natl Acad Sci USA*. 2011; 108(39):16322–16326. <https://doi.org/10.1073/pnas.1108490108> PMID: 21930900
22. Woodhams DC, Alford RA, Briggs CJ, Johnson M, Rollins-Smith LA. Life-history trade-offs influence disease in changing climates: strategies of an amphibian pathogen. *Ecology*. 2008; 89(6):1627–1639. PMID: 18589527
23. Farrer RA, Weinert LA, Bielby J, Garner TWJ, Balloux F, Clare F, et al. Multiple emergences of genetically diverse amphibian-infecting chytrids include a globalized hypervirulent recombinant lineage. *Proc Natl Acad Sci USA*. 2011; 108(46):18732–18736. <https://doi.org/10.1073/pnas.1111915108> PMID: 22065772
24. Raffel TR, Halstead NT, McMahon TA, Davis AK, Rohr JR. Temperature variability and moisture synergistically interact to exacerbate an epizootic disease. *Proc Biol Sci*. 2015; 282(1801).

25. Kolby JE, Padgett-Flohr GE, Field R. Amphibian chytrid fungus *Batrachochytrium dendrobatidis* in Cusuco National Park, Honduras. *Dis Aquat Organ*. 2010; 92(2–3):245–251. <https://doi.org/10.3354/dao02055> PMID: 21268988
26. Mitchell KM, Churcher TS, Garner TW, Fisher MC. Persistence of the emerging pathogen *Batrachochytrium dendrobatidis* outside the amphibian host greatly increases the probability of host extinction. *Proc Biol Sci*. 2008; 275(1632):329–334. <https://doi.org/10.1098/rspb.2007.1356> PMID: 18048287
27. Chestnut T, Anderson C, Popa R, Blaustein AR, Voytek M, Olson DH, et al. Heterogeneous occupancy and density estimates of the pathogenic fungus *Batrachochytrium dendrobatidis* in waters of North America. *PLoS One*. 2014; 9(9)
28. Schmeller DS, Blooi M, Martel A, Garner TWJ, Fisher MC, Azemar F, et al. Microscopic aquatic predators strongly affect infection dynamics of a globally emerged pathogen. *Curr Biol*. 2014; 24(2):176–180. <https://doi.org/10.1016/j.cub.2013.11.032> PMID: 24374305
29. Köhler G. *Amphibians of Central America*. 1st edition. Herpeton Verlag; 2011.
30. AmphibiaWeb. Information on amphibian declines, natural history, conservation and taxonomy. Berkeley, USA; <http://amphibiaweb.org>
31. The IUCN Red List of Threatened Species. The IUCN Red List of Threatened Species. Version 2016–1. <http://www.iucnredlist.org>
32. Green S, Slater K, Burdekin O, Long P. Cusuco National Park, Honduras 2012 status report. 2012.
33. Le Saout S, Hoffmann M, Shi Y, Hughes A, Bernard C, Brooks TM, et al. Conservation. Protected areas and effective biodiversity conservation. *Science*. 2013; 342(6160):803–805. <https://doi.org/10.1126/science.1239268> PMID: 24233709
34. Kriger KM, Hero JM. Chytridiomycosis, amphibian extinctions, and lessons for the prevention of future panzootics. *Ecohealth*. 2009; 6(1):6–10. <https://doi.org/10.1007/s10393-009-0228-y> PMID: 19421815
35. Brown N, Jennings S, Wheeler P, Nabe-Nielsen J. An improved method for the rapid assessment of forest understorey light environments. *J Appl Ecol*. 2000; 37(6):1044–1053.
36. Hyatt AD, Boyle DG, Olsen V, Boyle DB, Berger L, Obendorf D, et al. Diagnostic assays and sampling protocols for the detection of *Batrachochytrium dendrobatidis*. *Dis Aquat Organ*. 2007; 73(3):175–912. <https://doi.org/10.3354/dao073175> PMID: 17330737
37. Van Rooij P, Martel A, Nerz J, Voitel S, Van Immerseel F, Haesebrouck F, et al. Detection of *Batrachochytrium dendrobatidis* in Mexican bolitoglossine salamanders using an optimal sampling protocol. *Ecohealth*. 2011; 8(2):237–243. <https://doi.org/10.1007/s10393-011-0704-z> PMID: 21912986
38. Boyle DG, Boyle DB, Olsen V, Morgan JAT, Hyatt AD. Rapid quantitative detection of chytridiomycosis (*Batrachochytrium dendrobatidis*) in amphibian samples using real-time Taqman PCR assay. *Dis Aquat Organ*. 2004; 60(2):141–148. <https://doi.org/10.3354/dao060141> PMID: 15460858
39. Walker SF, Salas MB, Jenkins D, Garner TW, Cunningham AA, Hyatt AD, et al. Environmental detection of *Batrachochytrium dendrobatidis* in a temperate climate. *Dis Aquat Organ* 2007; 77(2):105–112. <https://doi.org/10.3354/dao01850> PMID: 17972751
40. Garland S, Baker A, Phillott AD, Skerratt LF. BSA reduces inhibition in a TaqMan<sup>®</sup> assay for the detection of *Batrachochytrium dendrobatidis*. *Dis Aquat Organ*. 2010; 92(2–3):113–116. <https://doi.org/10.3354/dao02053> PMID: 21268973
41. Blooi M, Martel A, Vercammen F, Pasmans F. Combining ethidium monoazide treatment with real-time PCR selectively quantifies viable *Batrachochytrium dendrobatidis* cells. *Fungal Biol*. 2013; 117(2):156–62. <https://doi.org/10.1016/j.funbio.2013.01.004> PMID: 23452953
42. Blooi M, Martel A, Vercammen F, Pasmans F. Combining ethidium monoazide treatment with real-time PCR selectively quantifies viable *Batrachochytrium dendrobatidis* cells. *Fungal Biol*. 2013; 117(2):156–162. <https://doi.org/10.1016/j.funbio.2013.01.004> PMID: 23452953
43. Witty LM. *Practical guide to identifying freshwater crustacean zooplankton*. 2nd edition. 2004.
44. Foissner W, Berger H. A user-friendly guide to ciliates (Protozoa, Ciliophora) commonly used by hydrobiologists as bioindicators in rivers, lakes, and waste waters, with notes on their ecology. *Freshw Biol*. 1996; 35(2):375–482.
45. Kozich JJ, Westcott SL, Baxter NT, Highlander SK, Schloss PD. Development of a dual-index sequencing strategy and curation pipeline for analyzing amplicon sequence data on the MiSeq Illumina sequencing platform. *Appl Environ Microbiol*. 2013; 79(17):5112–5120. <https://doi.org/10.1128/AEM.01043-13> PMID: 23793624
46. Amaral-Zettler LA, McCliment EA, Ducklow HW, Huse SM. A method for studying protistan diversity using massively parallel sequencing of V9 hypervariable regions of small-subunit ribosomal RNA genes. *PLoS One*. 2009; 4(7).



47. Vences M, Lyra ML, Bina Perl RG, Bletz MC, Stanković D, Lopes CM, Jarek M, Bhujju S, Geffers R, Hadad CFB, Steinfartz S. Freshwater vertebrate metabarcoding on Illumina platforms using ducle-indexed primers of the mitochondrial 16S rRNA gene. *Conserv Genet Resour*. 2016; 8(3):323–327.
48. Caporaso JG, Kuczynski J, Stombaugh J, Bittinger K, Bushman FD, Costello EK, et al. QIIME allows analysis of high-throughput community sequencing data. *Nat Methods*. 2010; 7(5):335–336. <https://doi.org/10.1038/nmeth.f.303> PMID: 20383131
49. Edgar RC. Search and clustering orders of magnitude faster than BLAST. *Bioinformatics*. 2010; 26(19):2460–2461. <https://doi.org/10.1093/bioinformatics/btq461> PMID: 20709691
50. Rideout JR, He Y, Navas-Molina JA, Walters WA, Ursell LK, Gibbons SM, et al. Subsampled open-reference clustering creates consistent, comprehensive OTU definitions and scales to billions of sequences. *PeerJ*. 2014; 2
51. caporaso JG, Bittinger K, Bushman FD, Desantis TZ, Andersen GL, Knight R. PyNASt: A flexible tool for aligning sequences to a template alignment. *Bioinformatics*. 2010; 26(2):266–267. <https://doi.org/10.1093/bioinformatics/btp636> PMID: 19914921
52. R Core Team. R: A language and environment for statistical computing. 2013. <http://www.r-project.org/>
53. Piotrowski JS, Annis SL, Longcore JE. Physiology of *Batrachochytrium dendrobatidis*, a chytrid pathogen of amphibians. *Mycologia*. 2004; 96(1):9–15. PMID: 21148822
54. Johnson ML, Speare R. Survival of *Batrachochytrium dendrobatidis* in water: Quarantine and disease control implications. *Emerg Infect Dis*. 2003; 9(8):922–925. <https://doi.org/10.3201/eid0908.030145> PMID: 12967488
55. Berger L, Hyatt AD, Speare R, Longcore JE. Life cycle stages of the amphibian chytrid *Batrachochytrium dendrobatidis*. *Dis Aquat Organ*. 2005; 68(1):51–63. <https://doi.org/10.3354/dao068051> PMID: 16465834
56. Maguire B. Phytotelmata: Biota and community structure determination in plant-held waters. *Annu Rev Ecol Syst*. 1971; 2:439–464.
57. Lopez LCS, Da Nóbrega Alves RR, Rios RI. Micro-environmental factors and the endemism of bromeliad aquatic fauna. *Hydrobiologia*. 2009; 625(1):151–156.
58. Jocque M, Kolby JE. Acidity of tank bromeliad water in a cloud forest, Cusuco National Park, Honduras. *Int J Plant Physiol Biochem*. 2012; 4(4):59–70.
59. Raffel TR, Rohr JR, Kiesecker JM, Hudson PJ. Negative effects of changing temperature on amphibian immunity under field conditions. *Funct Ecol*. 2006; 20(5):819–828.
60. Raffel TR, Romansch JM, Halstead NT, McMahon TA, Venesky MD, Rohr JR. Disease and thermal acclimation in a more variable and unpredictable climate. *Nat Clim Chang*. 2013; 3(2):146–151.
61. Hamilton PT, Richardson JML, Govindarajulu P, Anholt BR. Higher temperature variability increases the impact of *Batrachochytrium dendrobatidis* and shifts interspecific interactions in tadpole mesocosms. *Ecol Evol*. 2012; 2(10):2450–2459. <https://doi.org/10.1002/ece3.369> PMID: 23145331
62. Voyles J, Johnson LR, Briggs CJ, Cashins SD, Alford RA, Berger L, et al. Temperature alters reproductive life history patterns in *Batrachochytrium dendrobatidis*, a lethal pathogen associated with the global loss of amphibians. *Ecol Evol*. 2012; 2(9):2241–2249. <https://doi.org/10.1002/ece3.334> PMID: 23139882
63. Murray KA, Retallick RWR, Puschendorf R, Skerratt LF, Rosauer D, McCallum HI, et al. Assessing spatial patterns of disease risk to biodiversity: Implications for the management of the amphibian pathogen, *Batrachochytrium dendrobatidis*. *J Appl Ecol*. 2011; 48(1):163–173.
64. Strauss A, Smith KG. Why does amphibian chytrid (*Batrachochytrium dendrobatidis*) not occur everywhere? An exploratory study in Missouri ponds. *PLoS One*. 2013; 8(9).
65. Buck JC, Truong L, Blaustein AR. Predation by zooplankton on *Batrachochytrium dendrobatidis*: Biological control of the deadly amphibian chytrid fungus? *Biodivers Conserv*. 2011; 20(14):3549–3553.
66. Bacigalupe LD, Soto-Azat C, García-Vera C, Barría-Oyarzo I, Rezende EL. Effects of amphibian phylogeny, climate and human impact on the occurrence of the amphibian-killing chytrid fungus. *Global Change Biology*. 2017.
67. Briggs CJ, Knapp RA, Vredenburg VT. Enzootic and epizootic dynamics of the chytrid fungal pathogen of amphibians. *Proc Natl Acad Sci USA*. 2010; 107(21):9695–9700. <https://doi.org/10.1073/pnas.0912886107> PMID: 20457916
68. Blaustein AR, Romansch JM, Scheesele EA, Han BA, Pessier AP, Longcore JE. Interspecific variation in susceptibility of frog tadpoles to the pathogenic fungus *Batrachochytrium dendrobatidis*. *Conserv Biol*. 2005; 19(5):1460–1468.
